# Supplementary material for: Methionine promotes crop milk protein synthesis through the JAK2-STAT5 signaling during lactation of domestic pigeons (Columba livia)
Source: Royal Society of Chemistry journal article supplement (doi:10.1039/d0fo02257h), 2020-01-01
Supplement: d0fo02257h1.pdf [file d0fo02257h1.pdf]

**Title: Methionine activates PRLR/JAK2/STAT5 by regulating prolactin to promote crop milk protein synthesis during lactation of domestic pigeons (*Columba livia*)**

Meng-jie Chen<sup>1</sup>, Neng-xia Pan<sup>1</sup>, Xiu-qi Wang, Hui-chao Yan, Chun-qi Gao\*

College of Animal Science, South China Agricultural University/Guangdong Provincial Key Laboratory of Animal Nutrition Control/Key Laboratory of Chicken Genetics, Breeding and Reproduction, Ministry of Agriculture, Guangzhou 510642, China

<sup>1</sup>These authors contributed equally to this study.

\*Corresponding author: Chun-qi Gao, Associate Professor, College of Animal Science, South China Agricultural University, Guangzhou, Guangdong 510642, China.

Telephone: 86-20-38882017; Fax: 86-20-38882017;

E-mail: cqgao@scau.edu.cn



---

|                                 |       |       |       |       |       |       |       |       |       |
|---------------------------------|-------|-------|-------|-------|-------|-------|-------|-------|-------|
| Formulated nutrient composition |       |       |       |       |       |       |       |       |       |
| Metabolic energy (MJ/kg)        | 12.13 | 12.13 | 12.13 | 12.13 | 12.13 | 12.13 | 12.13 | 12.13 | 12.13 |
| Crude protein                   | 15.00 | 15.00 | 15.00 | 15.00 | 15.00 | 15.00 | 15.00 | 15.00 | 15.00 |
| Calcium                         | 0.76  | 0.76  | 0.76  | 0.76  | 0.76  | 0.76  | 0.76  | 0.76  | 0.76  |
| Total phosphorus                | 0.56  | 0.56  | 0.56  | 0.56  | 0.56  | 0.56  | 0.56  | 0.56  | 0.56  |
| Nonphytate phosphorus           | 0.32  | 0.32  | 0.32  | 0.32  | 0.32  | 0.32  | 0.32  | 0.32  | 0.32  |
| DL-Met                          | 0.25  | 0.40  | 0.55  | 0.70  | 0.85  | 0.25  | 0.25  | 0.25  | 0.25  |
| DL-Met-DL-Met                   | —     | —     | —     | —     | —     | 0.15  | 0.30  | 0.45  | 0.60  |
| Lysine                          | 0.96  | 0.96  | 0.96  | 0.96  | 0.96  | 0.96  | 0.96  | 0.96  | 0.96  |

---

1 The diet was prepared in the mode of "50% granulated grain +50% raw grain", and the formula of table was the composition of granulated grain; DL-Met = DL-methionine; DL-Met-DL-Met = DL-methionine-DL-methionine.

2 Provided per kilogram of diet: copper, 10 mg; iodine, 0.2 mg; pantothenic acid, 7.5 mg; iron, 35 mg; choline chloride, 200 mg; manganese, 55 mg; biotin, 0.12 mg; vitamin A, 4,000 IU; B1, 3 mg; vitamin B2, 13 mg; vitamin B6, 2 mg; vitamin B12, 25 µg; vitamin D3 1,725 IU; vitamin E, 24 mg; vitamin K3, 1 mg; selenium, 0.25 mg; niacin, 15 mg; folic acid, 0.55 mg; zinc, 35 mg.
